# Supplementary material
Source: PubMed Central journal article supplement (PMC2656187)
Supplement: 0813368106_0813368106SI.pdf [file 0813368106_0813368106SI.pdf]

# Supporting Information

El-Chemaly *et al.* 10.1073/pnas.0813368106

## Methods

**Migration and Proliferation Assays.** Human microvascular endothelial cells (HMEC)-1 ( $5 \times 10^5$ ) were placed in the upper chambers, and BALF without or with supplementation with short-fragment hyaluronan (5 mg/mL) (R&D Systems) was placed in the lower chambers of 96-well ChemoTx plates (Neuroprobe). After a 4-hour incubation at 37 °C, cells adherent to the pores were counted (1). Proliferation was assayed by reading the fluorescence generated by GFP-labeled HMEC-1 in the presence of BALF from the subjects with IPF and from healthy volunteers.

**Chemokine Levels.** BALF was concentrated (4 $\times$ ) using a centrifugal filter with a 3-kDa exclusion limit (Amicon Ultra; Milli-

pore). Prolymphangiogenic proteins (VEGF-A, -C, and -D; MCP-1; FGF-b; HGF; TIMP-1 and -2) were measured by ELISA using SearchLight proteome arrays (Pierce Biotechnology) (2) in BALF samples from 15 subjects with IPF and 12 healthy volunteers. Protein concentration was corrected for epithelial lining fluid dilution (3).

**Fluorescence-Activated Cell Sorting.** Bronchoscopy and bronchoalveolar lavage were performed as described previously (4). Cells isolated from BALF were collected by centrifugation (500  $\times$  g), washed, dispersed in PBS, and incubated for 30 min with antibodies CD45-FITC, CD14-APC, and CD11b-R-PE. Cell sorting was done as described previously (5).

1. Zudaire E, *et al.* (2008) The aryl hydrocarbon receptor repressor is a putative tumor-suppressor gene in multiple human cancers. *J Clin Invest* 118:640–650.
2. Moody MD, *et al.* (2001) Array-based ELISAs for high-throughput analysis of human cytokines. *Biotechniques* 31:186–190,192–194.
3. Rennard SI, *et al.* (1986) Estimation of volume of epithelial lining fluid recovered by lavage using urea as marker of dilution. *J Appl Physiol* 60:532–538.
4. Ren P, *et al.* (2007) Impairment of alveolar macrophage transcription in idiopathic pulmonary fibrosis. *Am J Respir Crit Care Med* 175:1151–1157.
5. Pacheco-Rodriguez G, *et al.* (2007) TSC2 loss in lymphangioleiomyomatosis cells correlated with expression of CD44v6, a molecular determinant of metastasis. *Cancer Res* 67:10573–10581.

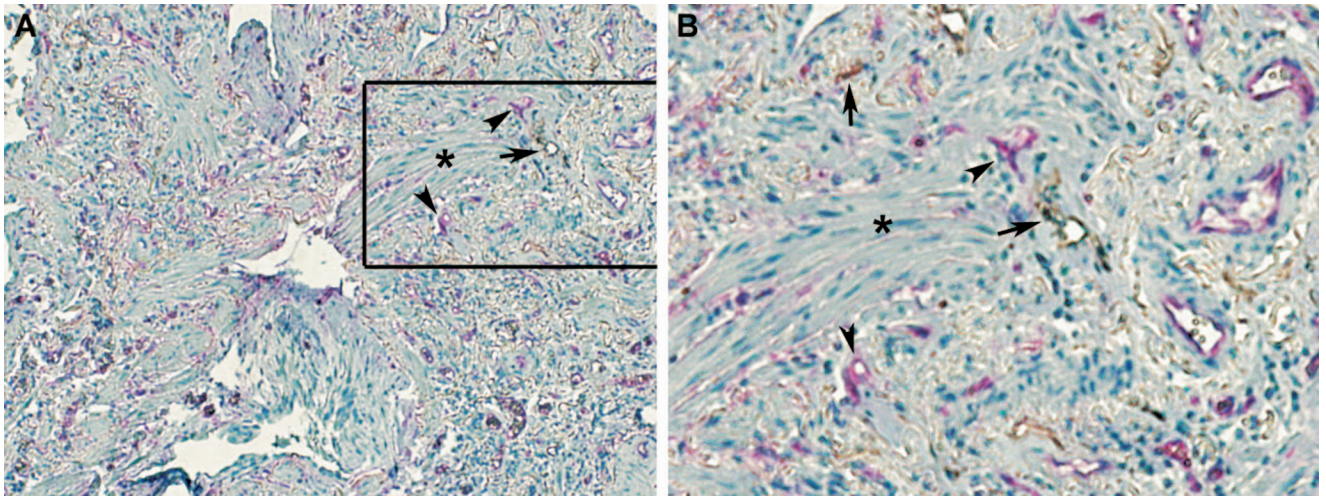

**Fig. 51.** Presence of lymphatic and blood vessels at the periphery of fibroblastic foci. (A) Reactivity with anti-D2-40 antibodies (arrow) and anti-CD34 antibodies (arrowhead) visualized with DAB and Fast Red, respectively, localized at the periphery of fibroblastic foci (\*) in IPF lung tissue sections. (B) High magnification of a selected area highlighted in (A). Nuclei are stained with hematoxylin.

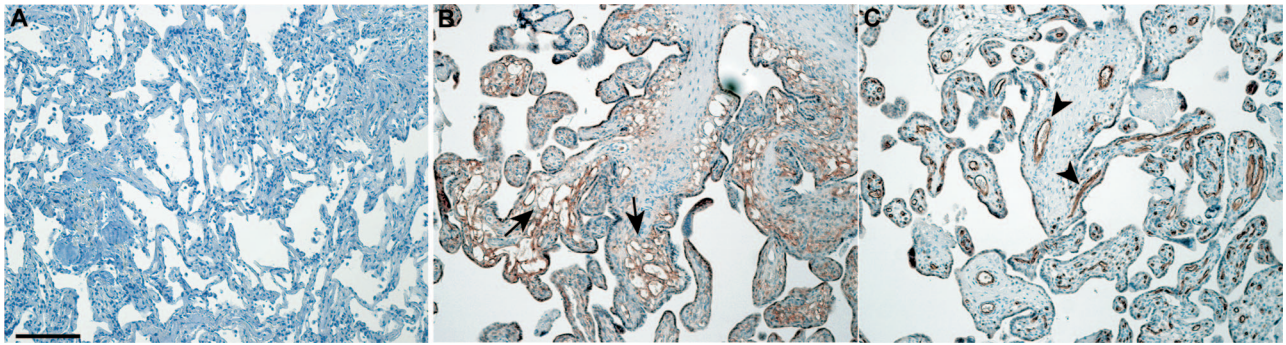

**Fig. S2.** Negative and positive controls for immunohistochemistry experiments. (A) IPF lung tissue section incubated with nonimmune IgG shows an absence of reactivity with anti-D2-40 and anti-CD34 antibodies. (B and C) Placental tissue used as a positive control demonstrates reactivity with anti-D2-40 antibodies (arrows) visualized with DAB (B) and reactivity with anti-CD34 antibodies (arrowheads) visualized with Fast Red (C). Nuclei are stained with hematoxylin.



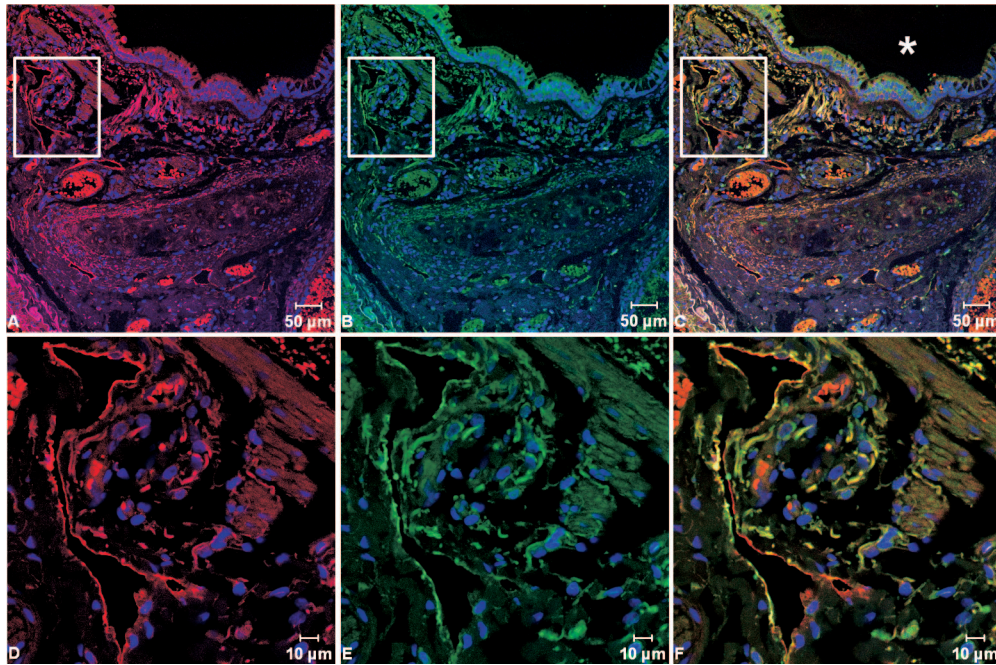

**Fig. S3.** In normal lung, LYVE-1 and podoplanin-positive lymphatic vessels are proximal to major vessels and airways. Immunofluorescence staining of paraffin-embedded sections of normal lung reveals podoplanin (red) and LYVE-1 (green) in lymphatic vessels. (A–C) Low-magnification view shows lymphatic vessels staining for both podoplanin and LYVE-1 in the proximity of large blood vessels and airways (\*). (D–F) High-magnification images of selected boxed areas. Nuclei are stained with DAPI (blue).

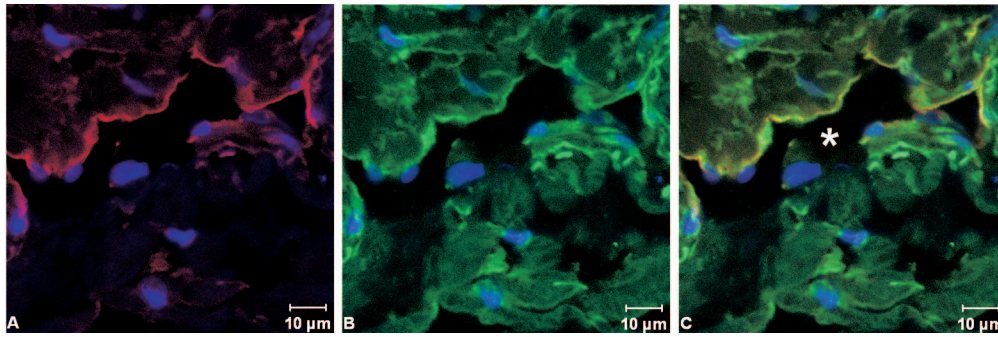

**Fig. S4.** Presence of LYVE-1 in podoplanin-positive lymphatic vessels in IPF lung. Immunofluorescence staining of paraffin-embedded sections of IPF lung tissue shows LYVE-1 (green) and podoplanin (red) in lymphatic vessels. (A and B) Fluorescence images show that lymphatic vessels (\*) that are reactive with anti-podoplanin antibodies (A) are reactive with anti-LYVE-1 antibodies (B). (C) Merged DIC and fluorescence images show colocalization of podoplanin with LYVE-1. Nuclei are stained with DAPI (blue).

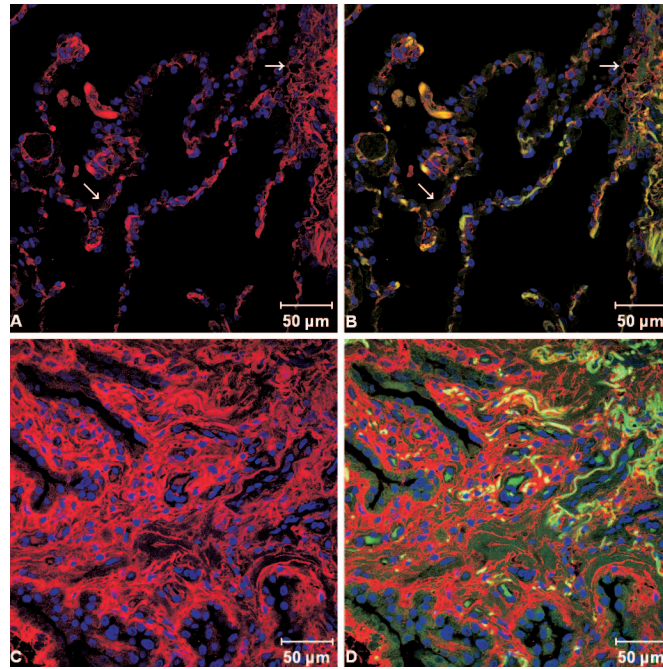

**Fig. S5.** IPF lung tissue sections show increased hyaluronic acid fluorescence staining compared with normal lung. Paraffin-embedded sections of normal (*A* and *B*) and IPF (*C* and *D*) lung tissue displaying staining for hyaluronic acid (red) are shown. Fluorescence images of hyaluronic acid (red) and DAPI (blue) are shown without (*A* and *C*) or with (*B* and *D*) autofluorescence signal (green). Cell nuclei are stained with DAPI (blue).







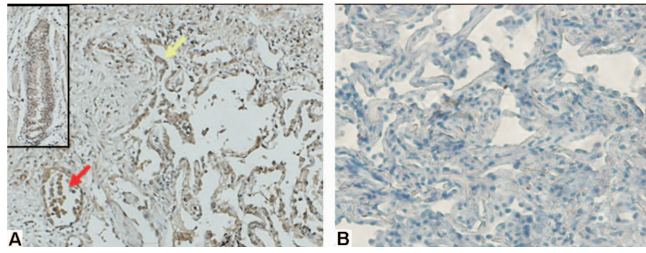

**Fig. 58.** Immunoreactive VEGF-C in IPF lung. (A) Immunoreactivity for VEGF-C visualized with diaminobenzidine (DAB) is observed in alveolar macrophages (red arrow), type II pneumocytes (yellow arrow), and airway epithelial cells (*Inset*). (B) Absence of immunoreactivity with nonimmune IgG.

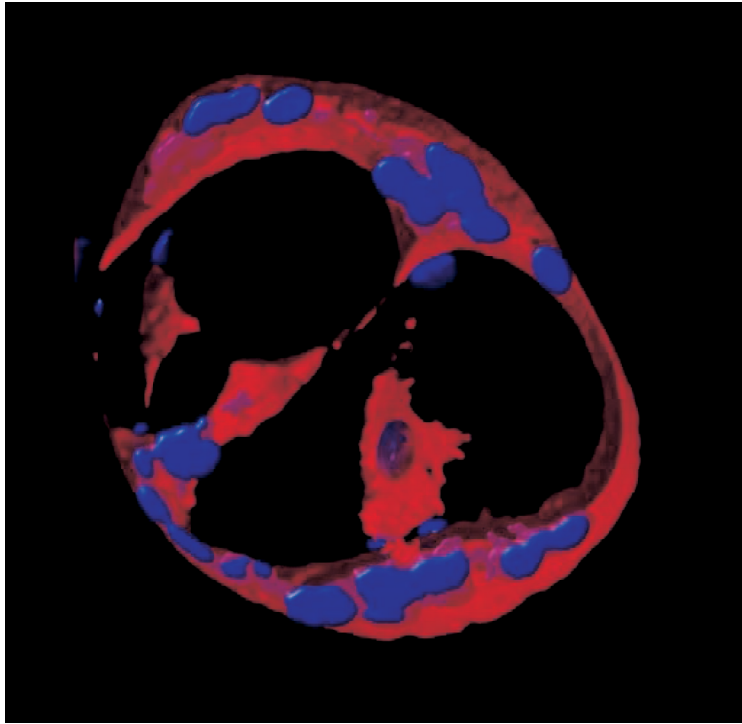

**Movie S1.** CD11b<sup>+</sup> alveolar macrophages in IPF develop tube-like structures in vitro. Avi file compressed with DivX codec available at <http://www.divx.com/>.

[Movie S1 \(avi\)](#)

**Table S1. Quantification of the number, perimeter, and area of D2-40- and CD34-positive vessels in IPF lung tissue sections**

|                                  | D2-40         |                  |                |          | CD34           |                  |                |          |
|----------------------------------|---------------|------------------|----------------|----------|----------------|------------------|----------------|----------|
|                                  | Mild (n = 3)  | Moderate (n = 5) | Severe (n = 4) | P value* | Mild (n = 3)   | Moderate (n = 5) | Severe (n = 4) | P value* |
| Number                           | 101.6 ± 21.4  | 79.2 ± 16.1      | 83.7 ± 8.18    | .18      | 81 ± 21.9      | 92 ± 31.9        | 169 ± 22.3     | .002     |
| Average perimeter, $\mu\text{m}$ | 49.2 ± 12.7   | 64.5 ± 8.05      | 81.5 ± 8.6     | .005     | 110 ± 32.4     | 79.9 ± 18.5      | 72.8 ± 25.1    | .171     |
| Average area, $\mu\text{m}^2$    | 95.9 ± 46.1   | 117 ± 30.2       | 206 ± 46.5     | .009     | 196 ± 78.2     | 111 ± 55.7       | 117 ± 53.8     | .182     |
| Total perimeter, $\mu\text{m}$   | 4,833 ± 465   | 5,092 ± 1,190    | 6,868 ± 1,401  | .072     | 8,452 ± 1,147  | 6,994 ± 1,554    | 11,900 ± 2,688 | .013     |
| Total area, $\mu\text{m}^2$      | 9,114 ± 2,476 | 9,334 ± 3,522    | 17,379 ± 4,992 | .024     | 14,820 ± 3,749 | 9,984 ± 5,439    | 18,823 ± 6,855 | .117     |

\*P value based on ANOVA. A 2-way comparison showed a significant difference between the severe and mild groups.

**Table S2. Characteristics of the subjects whose BALF was used for protein concentration and cell migration and proliferation experiments**

|                           | IPF subjects<br>(n = 15) | Healthy volunteers<br>(n = 14) |
|---------------------------|--------------------------|--------------------------------|
| Age, years, mean $\pm$ SD | 63.3 $\pm$ 11.1          | 41.3 $\pm$ 16.6                |
| Males/females             | 13/2                     | 8/6                            |
| Disease stage             |                          | NA                             |
| Mild                      | 3                        |                                |
| Moderate                  | 8                        |                                |
| Severe                    | 4                        |                                |
| Medical therapy*          | 9                        | NA                             |
| Supplemental oxygen       | 4                        | NA                             |

NA, not applicable.

\*Including prednisone, immunosuppressants, IFN- $\gamma$ , and/or colchicine.

**Table S3. Characteristics of subjects whose BALF was collected to isolate CD11b<sup>+</sup> macrophages**

|                                                                   | IPF subjects<br>(n = 4)* | Healthy volunteers<br>(n = 5) |
|-------------------------------------------------------------------|--------------------------|-------------------------------|
| Age, years, mean $\pm$ SD                                         | 65.8 $\pm$ 8.8           | 40.8 $\pm$ 11.6               |
| Males/females                                                     | 2/2                      | 3/2                           |
| Forced expiratory volume in 1 s, % predicted, mean $\pm$ SD       | 98.2 $\pm$ 32.7          | 95.4 $\pm$ 9.0                |
| Forced vital capacity, % predicted, mean $\pm$ SD                 | 88.9 $\pm$ 24.3          | 98.0 $\pm$ 4.9                |
| Total lung capacity, % predicted, mean $\pm$ SD                   | 81.9 $\pm$ 17.6          | 101.1 $\pm$ 6.9               |
| Diffusing capacity of the lung for CO, % predicted, mean $\pm$ SD | 63.9 $\pm$ 19.7          | 98.5 $\pm$ 21.9               |

\*No patients were receiving any therapy.



**Table S4. Antibodies used in this study**

| Antigen                | Application          | Source                                         |
|------------------------|----------------------|------------------------------------------------|
| Podoplanin             | Immunohistochemistry | Clone D2-40, Signet Laboratories               |
| CD34                   | Immunohistochemistry | Clone QBEnd/10, Signet Laboratories            |
| LYVE-1                 | Immunofluorescence   | Catalog no. 11-032, AngioBio                   |
| Podoplanin             | Immunofluorescence   | Catalog no.11-003, AngioBio                    |
| Mouse/Rabbit IgG       | Immunofluorescence   | Vector Laboratories                            |
| Texas Red streptavidin | Immunofluorescence   | Catalog no.016-070-084, Jackson ImmunoResearch |
| MCP-1                  | Function blocking    | AF-279-NA, R&D Systems                         |
| HGF                    | Function blocking    | AF-294-NA, R&D Systems                         |
| TIMP-1                 | Function blocking    | 9013-1008, AbD Serotec                         |
| CD45-FITC              | Flow cytometry       | Catalog no. 555482, BD Biosciences             |
| CD14-APC               | Flow cytometry       | Catalog no. 555399, BD Biosciences             |
| CD11b-R-PE             | Flow cytometry       | Catalog no. 555388, BD Biosciences             |
